# Supplementary material for: Genome-Wide Characterization of the C-repeat Binding Factor (CBF) Gene Family Involved in the Response to Abiotic Stresses in Tea Plant (Camellia sinensis)
Source: Front Plant Sci. 2020 Jul 23;11:921. doi: 10.3389/fpls.2020.00921 (PMC7396485; doi:10.3389/fpls.2020.00921)
Supplement: Data Sheet S2 — Expression level of CsCBFs under abiotic stresses. [file Data_Sheet_2.xlsx]

## Sheet: Sheet1
4℃						ABA
Fluor	Target	Sample	Cq	Cq Std. Dev		Fluor	Target	Sample	Cq	Cq Std. Dev
FAM	CBF1	4 0H	36.3611	1.12419		FAM	CBF1	0H	37.2755	0.144198
FAM	CBF1	4 0H	34.7203	1.12419		FAM	CBF1	0H	NaN	0
FAM	CBF1	4 0H	34.2095	1.12419		FAM	CBF1	0H	37.0716	0.144198
FAM	CBF1	4 4H	24.679	0.0896569		FAM	CBF1	4H	NaN	0
FAM	CBF1	4 4H	24.5042	0.0896569		FAM	CBF1	4H	33.5761	1.82279
FAM	CBF1	4 4H	24.5571	0.0896569		FAM	CBF1	4H	36.1539	1.82279
FAM	CBF1	4 12H	22.7253	0.082996		FAM	CBF1	12H	36.8283	1.82515
FAM	CBF1	4 12H	22.8157	0.082996		FAM	CBF1	12H	NaN	0
FAM	CBF1	4 12H	22.891	0.082996		FAM	CBF1	12H	34.2472	1.82515
FAM	CBF1	4 24H	23.9462	0.102515		FAM	CBF1	24H	36.3545	1.06942
FAM	CBF1	4 24H	23.7429	0.102515		FAM	CBF1	24H	34.2306	1.06942
FAM	CBF1	4 24H	23.8678	0.102515		FAM	CBF1	24H	35.0739	1.06942
FAM	CBF2	4 0H	31.1909	0.144783		FAM	CBF2	0H	33.401	0.209462
FAM	CBF2	4 0H	31.4793	0.144783		FAM	CBF2	0H	33.6384	0.209462
FAM	CBF2	4 0H	31.3581	0.144783		FAM	CBF2	0H	33.8186	0.209462
FAM	CBF2	4 4H	22.1065	0.078956		FAM	CBF2	4H	28.2411	0.0986095
FAM	CBF2	4 4H	22.0803	0.078956		FAM	CBF2	4H	28.412	0.0986095
FAM	CBF2	4 4H	21.9585	0.078956		FAM	CBF2	4H	28.4118	0.0986095
FAM	CBF2	4 12H	20.8279	0.100246		FAM	CBF2	12H	31.4779	0.275726
FAM	CBF2	4 12H	21.0255	0.100246		FAM	CBF2	12H	31.5333	0.275726
FAM	CBF2	4 12H	20.9557	0.100246		FAM	CBF2	12H	31.9808	0.275726
FAM	CBF2	4 24H	21.477	0.0541991		FAM	CBF2	24H	30.1818	0.117255
FAM	CBF2	4 24H	21.5845	0.0541991		FAM	CBF2	24H	29.9601	0.117255
FAM	CBF2	4 24H	21.5431	0.0541991		FAM	CBF2	24H	30.1371	0.117255
FAM	CBF3	4 0H	30.503	0.181047		FAM	CBF3	0H	32.8233	0.718424
FAM	CBF3	4 0H	30.6866	0.181047		FAM	CBF3	0H	32.5508	0.718424
FAM	CBF3	4 0H	30.3245	0.181047		FAM	CBF3	0H	31.4653	0.718424
FAM	CBF3	4 4H	24.8208	0.161149		FAM	CBF3	4H	32.7938	0.189627
FAM	CBF3	4 4H	24.5472	0.161149		FAM	CBF3	4H	32.5146	0.189627
FAM	CBF3	4 4H	24.5364	0.161149		FAM	CBF3	4H	32.4319	0.189627
FAM	CBF3	4 12H	22.5303	0.132766		FAM	CBF3	12H	32.7823	0.279636
FAM	CBF3	4 12H	22.7837	0.132766		FAM	CBF3	12H	32.5414	0.279636
FAM	CBF3	4 12H	22.7256	0.132766		FAM	CBF3	12H	32.2248	0.279636
FAM	CBF3	4 24H	23.0165	0.10725		FAM	CBF3	24H	32.3628	0.328898
FAM	CBF3	4 24H	23.0876	0.10725		FAM	CBF3	24H	31.7377	0.328898
FAM	CBF3	4 24H	23.2273	0.10725		FAM	CBF3	24H	32.2275	0.328898
FAM	CBF4	4 0H	32.8697	0.0996666		FAM	CBF4	0H	34.2762	1.22118
FAM	CBF4	4 0H	32.8316	0.0996666		FAM	CBF4	0H	34.6309	1.22118
FAM	CBF4	4 0H	33.0201	0.0996666		FAM	CBF4	0H	36.5462	1.22118
FAM	CBF4	4 4H	25.8802	0.0868959		FAM	CBF4	4H	34.1501	0.308141
FAM	CBF4	4 4H	25.7394	0.0868959		FAM	CBF4	4H	34.0138	0.308141
FAM	CBF4	4 4H	25.7216	0.0868959		FAM	CBF4	4H	34.6024	0.308141
FAM	CBF4	4 12H	26.2955	0.201528		FAM	CBF4	12H	35.2966	0.605457
FAM	CBF4	4 12H	26.4182	0.201528		FAM	CBF4	12H	34.1918	0.605457
FAM	CBF4	4 12H	26.6894	0.201528		FAM	CBF4	12H	35.1735	0.605457
FAM	CBF4	4 24H	30.1536	0.230502		FAM	CBF4	24H	33.086	0.262093
FAM	CBF4	4 24H	30.5276	0.230502		FAM	CBF4	24H	33.6073	0.262093
FAM	CBF4	4 24H	30.574	0.230502		FAM	CBF4	24H	33.3943	0.262093
FAM	CBF5	4 0H	33.3106	0.583496		FAM	CBF5	0H	34.0116	0.273079
FAM	CBF5	4 0H	33.1618	0.583496		FAM	CBF5	0H	34.3499	0.273079
FAM	CBF5	4 0H	32.2338	0.583496		FAM	CBF5	0H	34.5521	0.273079
FAM	CBF5	4 4H	24.037	0.188809		FAM	CBF5	4H	32.6044	0.0519004
FAM	CBF5	4 4H	23.7096	0.188809		FAM	CBF5	4H	32.5346	0.0519004
FAM	CBF5	4 4H	23.7104	0.188809		FAM	CBF5	4H	32.636	0.0519004
FAM	CBF5	4 12H	23.7924	0.175607		FAM	CBF5	12H	33.6054	0.152787
FAM	CBF5	4 12H	23.9376	0.175607		FAM	CBF5	12H	33.3289	0.152787
FAM	CBF5	4 12H	24.1419	0.175607		FAM	CBF5	12H	33.5799	0.152787
FAM	CBF5	4 24H	28.0172	0.0444088		FAM	CBF5	24H	33.0508	0.271395
FAM	CBF5	4 24H	28.1055	0.0444088		FAM	CBF5	24H	32.5333	0.271395
FAM	CBF5	4 24H	28.0697	0.0444088		FAM	CBF5	24H	32.6502	0.271395
FAM	CBF6	4 0H	28.5624	0.10732		FAM	CBF6	0H	33.2446	0.119939
FAM	CBF6	4 0H	28.3478	0.10732		FAM	CBF6	0H	33.0431	0.119939
FAM	CBF6	4 0H	28.4563	0.10732		FAM	CBF6	0H	33.0312	0.119939
FAM	CBF6	4 4H	26.0006	0.105571		FAM	CBF6	4H	32.1455	0.217023
FAM	CBF6	4 4H	25.8046	0.105571		FAM	CBF6	4H	32.5149	0.217023
FAM	CBF6	4 4H	25.9706	0.105571		FAM	CBF6	4H	32.1328	0.217023
FAM	CBF6	4 12H	25.8831	0.151178		FAM	CBF6	12H	32.9524	0.27091
FAM	CBF6	4 12H	26.1027	0.151178		FAM	CBF6	12H	32.8025	0.27091
FAM	CBF6	4 12H	26.1729	0.151178		FAM	CBF6	12H	33.3283	0.27091
FAM	CBF6	4 24H	27.2535	0.133589		FAM	CBF6	24H	30.4109	0.153135
FAM	CBF6	4 24H	27.4208	0.133589		FAM	CBF6	24H	30.717	0.153135
FAM	CBF6	4 24H	27.5176	0.133589		FAM	CBF6	24H	30.5562	0.153135
FAM	GAPDH	4 0H	21.4785	0.0493947		FAM	GAPDH	0H	23.5741	1.13892
FAM	GAPDH	4 0H	21.3903	0.0493947		FAM	GAPDH	0H	23.4681	1.13892
FAM	GAPDH	4 0H	21.3958	0.0493947		FAM	GAPDH	0H	21.5506	1.13892
FAM	GAPDH	4 4H	21.2812	0.0758558		FAM	GAPDH	6H	23.0202	0.00753624
FAM	GAPDH	4 4H	21.1306	0.0758558		FAM	GAPDH	6H	23.0298	0.00753624
FAM	GAPDH	4 4H	21.1899	0.0758558		FAM	GAPDH	6H	23.0351	0.00753624
FAM	GAPDH	4 12H	21.5309	0.170201		FAM	GAPDH	12H	23.1314	0.0232987
FAM	GAPDH	4 12H	21.765	0.170201		FAM	GAPDH	12H	23.1408	0.0232987
FAM	GAPDH	4 12H	21.862	0.170201		FAM	GAPDH	12H	23.1756	0.0232987
FAM	GAPDH	4 24H	22.0007	0.0875992		FAM	GAPDH	24H	22.2003	0.0888392
FAM	GAPDH	4 24H	22.0127	0.0875992		FAM	GAPDH	24H	22.3274	0.0888392
FAM	GAPDH	4 24H	22.1581	0.0875992		FAM	GAPDH	24H	22.3714	0.0888392
38℃						GA
Fluor	Target	Sample	Cq	Cq Std. Dev		Fluor	Target	Sample	Cq	Cq Std. Dev
FAM	CBF1	0H	34.3815	1.83054		FAM	CBF1	GA 0H	36.5297	0.486507
FAM	CBF1	0H	35.6446	1.83054		FAM	CBF1	GA 0H	37.2177	0.486507
FAM	CBF1	0H	37.9889	1.83054		FAM	CBF1	GA 0H	NaN	0
FAM	CBF1	4H	35.8363	0.217275		FAM	CBF1	GA 4H	38.8945	1.51939
FAM	CBF1	4H	36.0136	0.217275		FAM	CBF1	GA 4H	36.3401	1.51939
FAM	CBF1	4H	35.5813	0.217275		FAM	CBF1	GA 4H	39.0428	1.51939
FAM	CBF1	12H	30.1322	0.301221		FAM	CBF1	GA 12H	36.3962	0.100733
FAM	CBF1	12H	29.7345	0.301221		FAM	CBF1	GA 12H	36.5768	0.100733
FAM	CBF1	12H	30.3253	0.301221		FAM	CBF1	GA 12H	36.5638	0.100733
FAM	CBF1	24H	NaN	0		FAM	CBF1	GA 24H	35.489	0.367426
FAM	CBF1	24H	37.5257	0		FAM	CBF1	GA 24H	36.0086	0.367426
FAM	CBF1	24H	NaN	0		FAM	CBF1	GA 24H	NaN	0
FAM	CBF2	0H	35.4556	1.20882		FAM	CBF2	GA 0H	31.0174	0.296521
FAM	CBF2	0H	33.7902	1.20882		FAM	CBF2	GA 0H	31.5984	0.296521
FAM	CBF2	0H	33.1051	1.20882		FAM	CBF2	GA 0H	31.4108	0.296521
FAM	CBF2	4H	30.9587	0.192932		FAM	CBF2	GA 4H	26.7745	0.0901591
FAM	CBF2	4H	30.6686	0.192932		FAM	CBF2	GA 4H	26.8301	0.0901591
FAM	CBF2	4H	31.034	0.192932		FAM	CBF2	GA 4H	26.9508	0.0901591
FAM	CBF2	12H	29.0637	0.106294		FAM	CBF2	GA 12H	29.6474	0.0830878
FAM	CBF2	12H	29.2601	0.106294		FAM	CBF2	GA 12H	29.5017	0.0830878
FAM	CBF2	12H	29.2324	0.106294		FAM	CBF2	GA 12H	29.5053	0.0830878
FAM	CBF2	24H	33.9061	0.462207		FAM	CBF2	GA 24H	30.7391	0.197944
FAM	CBF2	24H	33.1055	0.462207		FAM	CBF2	GA 24H	30.3513	0.197944
FAM	CBF2	24H	33.1057	0.462207		FAM	CBF2	GA 24H	30.614	0.197944
FAM	CBF3	0H	31.9037	0.203822		FAM	CBF3	GA 0H	29.9594	0.095997
FAM	CBF3	0H	31.6317	0.203822		FAM	CBF3	GA 0H	29.7772	0.095997
FAM	CBF3	0H	31.5047	0.203822		FAM	CBF3	GA 0H	29.9208	0.095997
FAM	CBF3	4H	31.747	0.296789		FAM	CBF3	GA 4H	30.2857	0.188153
FAM	CBF3	4H	31.9946	0.296789		FAM	CBF3	GA 4H	29.9308	0.188153
FAM	CBF3	4H	31.4036	0.296789		FAM	CBF3	GA 4H	29.9998	0.188153
FAM	CBF3	12H	32.4862	0.109701		FAM	CBF3	GA 12H	30.1789	0.222966
FAM	CBF3	12H	32.5886	0.109701		FAM	CBF3	GA 12H	30.6142	0.222966
FAM	CBF3	12H	32.3693	0.109701		FAM	CBF3	GA 12H	30.3127	0.222966
FAM	CBF3	24H	32.4501	0.481142		FAM	CBF3	GA 24H	29.5612	0.0654218
FAM	CBF3	24H	33.0261	0.481142		FAM	CBF3	GA 24H	29.6837	0.0654218
FAM	CBF3	24H	32.0705	0.481142		FAM	CBF3	GA 24H	29.5825	0.0654218
FAM	CBF4	0H	34.392	0.458709		FAM	CBF4	GA 0H	33.1042	0.127878
FAM	CBF4	0H	33.7447	0.458709		FAM	CBF4	GA 0H	32.96	0.127878
FAM	CBF4	0H	33.5054	0.458709		FAM	CBF4	GA 0H	32.8492	0.127878
FAM	CBF4	4H	35.2596	0.412337		FAM	CBF4	GA 4H	33.4474	0.365948
FAM	CBF4	4H	35.2366	0.412337		FAM	CBF4	GA 4H	32.8157	0.365948
FAM	CBF4	4H	34.5342	0.412337		FAM	CBF4	GA 4H	32.8115	0.365948
FAM	CBF4	12H	35.2655	0.327072		FAM	CBF4	GA 12H	31.1794	0.219454
FAM	CBF4	12H	34.7238	0.327072		FAM	CBF4	GA 12H	31.4275	0.219454
FAM	CBF4	12H	35.3123	0.327072		FAM	CBF4	GA 12H	31.617	0.219454
FAM	CBF4	24H	NaN	0		FAM	CBF4	GA 24H	31.6891	0.326056
FAM	CBF4	24H	NaN	0		FAM	CBF4	GA 24H	31.4375	0.326056
FAM	CBF4	24H	38.3389	0		FAM	CBF4	GA 24H	32.0844	0.326056
FAM	CBF5	0H	35.5308	0.235601		FAM	CBF5	GA 0H	31.3203	0.133597
FAM	CBF5	0H	35.0812	0.235601		FAM	CBF5	GA 0H	31.4507	0.133597
FAM	CBF5	0H	35.4281	0.235601		FAM	CBF5	GA 0H	31.1835	0.133597
FAM	CBF5	4H	35.9418	0.266334		FAM	CBF5	GA 4H	31.4691	0.0621728
FAM	CBF5	4H	36.1467	0.266334		FAM	CBF5	GA 4H	31.3451	0.0621728
FAM	CBF5	4H	35.6184	0.266334		FAM	CBF5	GA 4H	31.3989	0.0621728
FAM	CBF5	12H	32.7086	0.0823228		FAM	CBF5	GA 12H	31.3489	0.165703
FAM	CBF5	12H	32.5513	0.0823228		FAM	CBF5	GA 12H	31.0662	0.165703
FAM	CBF5	12H	32.6722	0.0823228		FAM	CBF5	GA 12H	31.0578	0.165703
FAM	CBF5	24H	38.811	0.87773		FAM	CBF5	GA 24H	31.5829	0.239738
FAM	CBF5	24H	37.4039	0.87773		FAM	CBF5	GA 24H	32.0295	0.239738
FAM	CBF5	24H	37.1985	0.87773		FAM	CBF5	GA 24H	31.9572	0.239738
FAM	CBF6	0H	31.4508	0.319384		FAM	CBF6	GA 0H	29.3382	0.211005
FAM	CBF6	0H	30.9074	0.319384		FAM	CBF6	GA 0H	29.2911	0.211005
FAM	CBF6	0H	31.4699	0.319384		FAM	CBF6	GA 0H	29.6779	0.211005
FAM	CBF6	4H	33.6796	0.202961		FAM	CBF6	GA 4H	28.4721	0.130725
FAM	CBF6	4H	33.7568	0.202961		FAM	CBF6	GA 4H	28.4312	0.130725
FAM	CBF6	4H	33.3731	0.202961		FAM	CBF6	GA 4H	28.6753	0.130725
FAM	CBF6	12H	34.9466	0.375796		FAM	CBF6	GA 12H	31.1521	0.0768808
FAM	CBF6	12H	34.3674	0.375796		FAM	CBF6	GA 12H	31.0927	0.0768808
FAM	CBF6	12H	35.0718	0.375796		FAM	CBF6	GA 12H	30.9996	0.0768808
FAM	CBF6	24H	36.4096	0.363854		FAM	CBF6	GA 24H	28.3892	0.118318
FAM	CBF6	24H	36.2078	0.363854		FAM	CBF6	GA 24H	28.3197	0.118318
FAM	CBF6	24H	36.9142	0.363854		FAM	CBF6	GA 24H	28.5503	0.118318
FAM	GAPDH	0H	22.2943	0.0606521		FAM	GAPDH	GA 0H	21.2559	0.0854811
FAM	GAPDH	0H	22.3314	0.0606521		FAM	GAPDH	GA 0H	21.0876	0.0854811
FAM	GAPDH	0H	22.2128	0.0606521		FAM	GAPDH	GA 0H	21.1461	0.0854811
FAM	GAPDH	4H	23.1049	0.0359391		FAM	GAPDH	GA 4H	21.5352	0.0402989
FAM	GAPDH	4H	23.1646	0.0359391		FAM	GAPDH	GA 4H	21.5349	0.0402989
FAM	GAPDH	4H	23.1694	0.0359391		FAM	GAPDH	GA 4H	21.4653	0.0402989
FAM	GAPDH	12H	23.9239	0.237766		FAM	GAPDH	GA 12H	21.8061	0.0842985
FAM	GAPDH	12H	23.5138	0.237766		FAM	GAPDH	GA 12H	21.9747	0.0842985
FAM	GAPDH	12H	23.5104	0.237766		FAM	GAPDH	GA 12H	21.891	0.0842985
FAM	GAPDH	24H	23.233	0.0382937		FAM	GAPDH	GA 24H	21.245	0.145817
FAM	GAPDH	24H	23.1766	0.0382937		FAM	GAPDH	GA 24H	21.5322	0.145817
FAM	GAPDH	24H	23.2497	0.0382937		FAM	GAPDH	GA 24H	21.3448	0.145817
PEG						MeJA
FAM	CBF1	PEG 0H	39.3144	2.76458		FAM	CBF1	0H	37.5688	0.58407
FAM	CBF1	PEG 0H	38.2827	2.76458		FAM	CBF1	0H	38.2488	0.58407
FAM	CBF1	PEG 0H	37.251	2.76458		FAM	CBF1	0H	38.7314	0.58407
FAM	CBF1	PEG 4H	35.211	0		FAM	CBF1	4H	38.9805	1.83439
FAM	CBF1	PEG 4H	NaN	0		FAM	CBF1	4H	40.7074	1.83439
FAM	CBF1	PEG 4H	NaN	0		FAM	CBF1	4H	37.0407	1.83439
FAM	CBF1	PEG 12H	39.2062	3.4931		FAM	CBF1	12H	39.0583	0.437525
FAM	CBF1	PEG 12H	34.2662	3.4931		FAM	CBF1	12H	38.8364	0.437525
FAM	CBF1	PEG 12H	NaN	0		FAM	CBF1	12H	39.6804	0.437525
FAM	CBF1	PEG 24H	34.5491	3.2077		FAM	CBF1	24H	NaN	0
FAM	CBF1	PEG 24H	39.0854	3.2077		FAM	CBF1	24H	NaN	0
FAM	CBF1	PEG 24H	NaN	0		FAM	CBF1	24H	37.7189	0
FAM	CBF2	PEG 0H	30.1941	0.123118		FAM	CBF2	0H	33.6843	0.49473
FAM	CBF2	PEG 0H	30.1983	0.123118		FAM	CBF2	0H	33.206	0.49473
FAM	CBF2	PEG 0H	30.4094	0.123118		FAM	CBF2	0H	32.695	0.49473
FAM	CBF2	PEG 4H	28.1654	0.354974		FAM	CBF2	4H	33.2478	1.3155
FAM	CBF2	PEG 4H	28.1261	0.354974		FAM	CBF2	4H	35.2503	1.3155
FAM	CBF2	PEG 4H	27.5318	0.354974		FAM	CBF2	4H	35.7268	1.3155
FAM	CBF2	PEG 12H	27.5668	0.076832		FAM	CBF2	12H	34.6011	0
FAM	CBF2	PEG 12H	27.702	0.076832		FAM	CBF2	12H	NaN	0
FAM	CBF2	PEG 12H	27.6977	0.076832		FAM	CBF2	12H	NaN	0
FAM	CBF2	PEG 24H	29.4657	0.0674431		FAM	CBF2	24H	NaN	0
FAM	CBF2	PEG 24H	29.4518	0.0674431		FAM	CBF2	24H	36.5935	0.790624
FAM	CBF2	PEG 24H	29.575	0.0674431		FAM	CBF2	24H	35.4754	0.790624
FAM	CBF3	PEG 0H	29.0613	0.166164		FAM	CBF3	0H	29.6386	0.384919
FAM	CBF3	PEG 0H	29.145	0.166164		FAM	CBF3	0H	29.348	0.384919
FAM	CBF3	PEG 0H	29.3817	0.166164		FAM	CBF3	0H	30.1107	0.384919
FAM	CBF3	PEG 4H	31.4675	0.419423		FAM	CBF3	4H	30.2591	0.201576
FAM	CBF3	PEG 4H	30.6288	0.419423		FAM	CBF3	4H	30.5527	0.201576
FAM	CBF3	PEG 4H	31.0336	0.419423		FAM	CBF3	4H	30.1666	0.201576
FAM	CBF3	PEG 12H	28.6882	0.178635		FAM	CBF3	12H	29.8782	0.150508
FAM	CBF3	PEG 12H	29.0438	0.178635		FAM	CBF3	12H	30.1038	0.150508
FAM	CBF3	PEG 12H	28.8356	0.178635		FAM	CBF3	12H	30.1636	0.150508
FAM	CBF3	PEG 24H	29.0108	0.0781915		FAM	CBF3	24H	29.8817	0.191719
FAM	CBF3	PEG 24H	29.1435	0.0781915		FAM	CBF3	24H	30.0596	0.191719
FAM	CBF3	PEG 24H	29.1487	0.0781915		FAM	CBF3	24H	30.2649	0.191719
FAM	CBF4	PEG 0H	31.768	0.400444		FAM	CBF4	0H	32.4847	0.38949
FAM	CBF4	PEG 0H	32.0032	0.400444		FAM	CBF4	0H	31.7058	0.38949
FAM	CBF4	PEG 0H	31.2226	0.400444		FAM	CBF4	0H	32.1087	0.38949
FAM	CBF4	PEG 4H	40.001	0.878765		FAM	CBF4	4H	32.2904	0.253742
FAM	CBF4	PEG 4H	NaN	0		FAM	CBF4	4H	32.0168	0.253742
FAM	CBF4	PEG 4H	38.7583	0.878765		FAM	CBF4	4H	31.7834	0.253742
FAM	CBF4	PEG 12H	32.3976	0.576254		FAM	CBF4	12H	35.5517	1.16518
FAM	CBF4	PEG 12H	33.1824	0.576254		FAM	CBF4	12H	37.8298	1.16518
FAM	CBF4	PEG 12H	32.059	0.576254		FAM	CBF4	12H	36.2661	1.16518
FAM	CBF4	PEG 24H	31.4637	0.38363		FAM	CBF4	24H	34.2795	0.362408
FAM	CBF4	PEG 24H	32.2302	0.38363		FAM	CBF4	24H	33.9511	0.362408
FAM	CBF4	PEG 24H	31.8755	0.38363		FAM	CBF4	24H	33.5557	0.362408
FAM	CBF5	PEG 0H	32.6678	0.239639		FAM	CBF5	0H	34.91	0.659673
FAM	CBF5	PEG 0H	32.2454	0.239639		FAM	CBF5	0H	34.7192	0.659673
FAM	CBF5	PEG 0H	32.6528	0.239639		FAM	CBF5	0H	35.1008	0.659673
FAM	CBF5	PEG 4H	34.221	0.493792		FAM	CBF5	4H	35.2971	0.709761
FAM	CBF5	PEG 4H	33.234	0.493792		FAM	CBF5	4H	34.9924	0.709761
FAM	CBF5	PEG 4H	33.7574	0.493792		FAM	CBF5	4H	34.6877	0.709761
FAM	CBF5	PEG 12H	33.8842	0.769845		FAM	CBF5	12H	36.1089	1.22115
FAM	CBF5	PEG 12H	32.5088	0.769845		FAM	CBF5	12H	35.9593	1.22115
FAM	CBF5	PEG 12H	32.5972	0.769845		FAM	CBF5	12H	36.0341	1.22115
FAM	CBF5	PEG 24H	32.0431	0.165411		FAM	CBF5	24H	36.2046	0.958354
FAM	CBF5	PEG 24H	32.2384	0.165411		FAM	CBF5	24H	35.9357	0.958354
FAM	CBF5	PEG 24H	32.372	0.165411		FAM	CBF5	24H	36.0702	0.958354
FAM	CBF6	PEG 0H	27.2379	0.0561684		FAM	CBF6	0H	31.4581	0.264895
FAM	CBF6	PEG 0H	27.3015	0.0561684		FAM	CBF6	0H	31.8159	0.264895
FAM	CBF6	PEG 0H	27.3499	0.0561684		FAM	CBF6	0H	31.9754	0.264895
FAM	CBF6	PEG 4H	31.6254	0.260171		FAM	CBF6	4H	28.583	0.0927968
FAM	CBF6	PEG 4H	32.1337	0.260171		FAM	CBF6	4H	28.7386	0.0927968
FAM	CBF6	PEG 4H	31.9758	0.260171		FAM	CBF6	4H	28.5732	0.0927968
FAM	CBF6	PEG 12H	29.0121	0.066627		FAM	CBF6	12H	30.2062	0.210539
FAM	CBF6	PEG 12H	29.0136	0.066627		FAM	CBF6	12H	30.2445	0.210539
FAM	CBF6	PEG 12H	29.1282	0.066627		FAM	CBF6	12H	30.5885	0.210539
FAM	CBF6	PEG 24H	27.6963	0.239133		FAM	CBF6	24H	33.0162	0.454114
FAM	CBF6	PEG 24H	28.1152	0.239133		FAM	CBF6	24H	33.8008	0.454114
FAM	CBF6	PEG 24H	27.7058	0.239133		FAM	CBF6	24H	33.0122	0.454114
FAM	GAPDH	PEG 0H	19.9052	0.17176		FAM	GAPDH	0H	21.7229	0.0688487
FAM	GAPDH	PEG 0H	19.5924	0.17176		FAM	GAPDH	0H	21.6051	0.0688487
FAM	GAPDH	PEG 0H	19.6258	0.17176		FAM	GAPDH	0H	21.7258	0.0688487
FAM	GAPDH	PEG 4H	22.2344	0.0387154		FAM	GAPDH	4H	21.2877	0.0502447
FAM	GAPDH	PEG 4H	22.2007	0.0387154		FAM	GAPDH	4H	21.2302	0.0502447
FAM	GAPDH	PEG 4H	22.2779	0.0387154		FAM	GAPDH	4H	21.3304	0.0502447
FAM	GAPDH	PEG 12H	20.2284	0.130987		FAM	GAPDH	12H	22.0808	0.0883781
FAM	GAPDH	PEG 12H	20.1924	0.130987		FAM	GAPDH	12H	22.1656	0.0883781
FAM	GAPDH	PEG 12H	20.4351	0.130987		FAM	GAPDH	12H	22.2575	0.0883781
FAM	GAPDH	PEG 24H	20.285	0.0134223		FAM	GAPDH	24H	22.3498	0.0259179
FAM	GAPDH	PEG 24H	20.2934	0.0134223		FAM	GAPDH	24H	22.4002	0.0259179
FAM	GAPDH	PEG 24H	20.3113	0.0134223		FAM	GAPDH	24H	22.3855	0.0259179
Salinity						SA
FAM	CBF1	0H	NaN	0		FAM	CBF1	0H	NaN	0
FAM	CBF1	0H	37.8703	1.20947		FAM	CBF1	0H	NaN	0
FAM	CBF1	0H	39.5807	1.20947		FAM	CBF1	0H	37.5025	0
FAM	CBF1	4H	NaN	0		FAM	CBF1	4H	38.005	1.633
FAM	CBF1	4H	38.9294	1.32953		FAM	CBF1	4H	NaN	0
FAM	CBF1	4H	37.0491	1.32953		FAM	CBF1	4H	40.3144	1.633
FAM	CBF1	12H	37.7274	0.888591		FAM	CBF1	12H	38.7164	0.903485
FAM	CBF1	12H	39.464	0.888591		FAM	CBF1	12H	36.9808	0.903485
FAM	CBF1	12H	38.2688	0.888591		FAM	CBF1	12H	38.2841	0.903485
FAM	CBF1	24H	34.7244	0.845963		FAM	CBF1	24H	35.4848	2.03449
FAM	CBF1	24H	35.269	0.845963		FAM	CBF1	24H	39.413	2.03449
FAM	CBF1	24H	36.384	0.845963		FAM	CBF1	24H	38.3679	2.03449
FAM	CBF2	0H	33.0231	0.455661		FAM	CBF2	0H	31.563	0.408987
FAM	CBF2	0H	33.1751	0.455661		FAM	CBF2	0H	31.9177	0.408987
FAM	CBF2	0H	33.8772	0.455661		FAM	CBF2	0H	31.102	0.408987
FAM	CBF2	4H	36.2072	1.02088		FAM	CBF2	4H	27.6237	0.12849
FAM	CBF2	4H	34.2231	1.02088		FAM	CBF2	4H	27.4541	0.12849
FAM	CBF2	4H	35.6324	1.02088		FAM	CBF2	4H	27.7061	0.12849
FAM	CBF2	12H	32.9585	0.597294		FAM	CBF2	12H	33.4378	0.159677
FAM	CBF2	12H	32.0688	0.597294		FAM	CBF2	12H	33.6583	0.159677
FAM	CBF2	12H	31.8233	0.597294		FAM	CBF2	12H	33.348	0.159677
FAM	CBF2	24H	33.1957	0.604077		FAM	CBF2	24H	31.1813	0.0750582
FAM	CBF2	24H	32.075	0.604077		FAM	CBF2	24H	31.286	0.0750582
FAM	CBF2	24H	32.2445	0.604077		FAM	CBF2	24H	31.1405	0.0750582
FAM	CBF3	0H	32.3693	0.377095		FAM	CBF3	0H	30.8832	0.166092
FAM	CBF3	0H	32.3355	0.377095		FAM	CBF3	0H	31.1102	0.166092
FAM	CBF3	0H	33.0049	0.377095		FAM	CBF3	0H	31.2068	0.166092
FAM	CBF3	4H	38.6591	2.0432		FAM	CBF3	4H	31.3574	0.093644
FAM	CBF3	4H	37.3304	2.0432		FAM	CBF3	4H	31.4965	0.093644
FAM	CBF3	4H	34.6482	2.0432		FAM	CBF3	4H	31.3184	0.093644
FAM	CBF3	12H	33.1114	0.254934		FAM	CBF3	12H	31.5255	0.361965
FAM	CBF3	12H	33.5832	0.254934		FAM	CBF3	12H	32.2483	0.361965
FAM	CBF3	12H	33.1798	0.254934		FAM	CBF3	12H	31.8519	0.361965
FAM	CBF3	24H	30.5157	0.3177		FAM	CBF3	24H	32.2858	0.193062
FAM	CBF3	24H	30.0715	0.3177		FAM	CBF3	24H	32.5427	0.193062
FAM	CBF3	24H	29.9001	0.3177		FAM	CBF3	24H	32.6639	0.193062
FAM	CBF4	0H	37.8379	0.78701		FAM	CBF4	0H	33.3426	0.41568
FAM	CBF4	0H	36.3002	0.78701		FAM	CBF4	0H	33.5192	0.41568
FAM	CBF4	0H	37.3603	0.78701		FAM	CBF4	0H	34.1344	0.41568
FAM	CBF4	4H	35.274	0.992257		FAM	CBF4	4H	37.8903	1.64152
FAM	CBF4	4H	37.1829	0.992257		FAM	CBF4	4H	34.6916	1.64152
FAM	CBF4	4H	35.7586	0.992257		FAM	CBF4	4H	35.6507	1.64152
FAM	CBF4	12H	33.5044	0.265312		FAM	CBF4	12H	37.3513	0.654316
FAM	CBF4	12H	32.9747	0.265312		FAM	CBF4	12H	36.1263	0.654316
FAM	CBF4	12H	33.2673	0.265312		FAM	CBF4	12H	36.3402	0.654316
FAM	CBF4	24H	33.0895	0.645132		FAM	CBF4	24H	32.7466	0.207406
FAM	CBF4	24H	34.3576	0.645132		FAM	CBF4	24H	32.8127	0.207406
FAM	CBF4	24H	33.517	0.645132		FAM	CBF4	24H	33.1343	0.207406
FAM	CBF5	0H	36.7113	0.782942		FAM	CBF5	0H	33.236	0.226122
FAM	CBF5	0H	35.1637	0.782942		FAM	CBF5	0H	33.6582	0.226122
FAM	CBF5	0H	36.1443	0.782942		FAM	CBF5	0H	33.3067	0.226122
FAM	CBF5	4H	NaN	0		FAM	CBF5	4H	35.3744	0.765218
FAM	CBF5	4H	NaN	0		FAM	CBF5	4H	35.3135	0.765218
FAM	CBF5	4H	38.3392	0		FAM	CBF5	4H	34.0196	0.765218
FAM	CBF5	12H	35.7252	0.115437		FAM	CBF5	12H	35.7515	0.241779
FAM	CBF5	12H	35.9373	0.115437		FAM	CBF5	12H	36.1695	0.241779
FAM	CBF5	12H	35.9101	0.115437		FAM	CBF5	12H	35.7499	0.241779
FAM	CBF5	24H	34.484	1.414		FAM	CBF5	24H	36.2736	0.743743
FAM	CBF5	24H	37.154	1.414		FAM	CBF5	24H	34.9254	0.743743
FAM	CBF5	24H	35.0119	1.414		FAM	CBF5	24H	36.1436	0.743743
FAM	CBF6	0H	35.0575	1.11355		FAM	CBF6	0H	36.1034	1.43411
FAM	CBF6	0H	32.8361	1.11355		FAM	CBF6	0H	35.3386	1.43411
FAM	CBF6	0H	34.085	1.11355		FAM	CBF6	0H	38.115	1.43411
FAM	CBF6	4H	34.5311	0.639805		FAM	CBF6	4H	35.2319	0.606219
FAM	CBF6	4H	33.8235	0.639805		FAM	CBF6	4H	36.0562	0.606219
FAM	CBF6	4H	35.1006	0.639805		FAM	CBF6	4H	36.414	0.606219
FAM	CBF6	12H	36.2818	0.309166		FAM	CBF6	12H	34.4369	1.1304
FAM	CBF6	12H	NaN	0		FAM	CBF6	12H	34.7172	1.1304
FAM	CBF6	12H	35.8445	0.309166		FAM	CBF6	12H	36.5198	1.1304
FAM	CBF6	24H	37.1734	0.462835		FAM	CBF6	24H	31.8355	0.15449
FAM	CBF6	24H	36.5189	0.462835		FAM	CBF6	24H	32.0658	0.15449
FAM	CBF6	24H	NaN	0		FAM	CBF6	24H	31.7723	0.15449
FAM	GAPDH	0H	22.2624	0.030763		FAM	GAPDH	0H	22.2258	0.117529
FAM	GAPDH	0H	22.2054	0.030763		FAM	GAPDH	0H	22.4368	0.117529
FAM	GAPDH	0H	22.254	0.030763		FAM	GAPDH	0H	22.2417	0.117529
FAM	GAPDH	4H	23.0898	0.195478		FAM	GAPDH	4H	22.1608	0.0882517
FAM	GAPDH	4H	22.8028	0.195478		FAM	GAPDH	4H	22.1262	0.0882517
FAM	GAPDH	4H	23.1762	0.195478		FAM	GAPDH	4H	22.2934	0.0882517
FAM	GAPDH	12H	22.5189	0.241428		FAM	GAPDH	12H	20.8008	0.0407833
FAM	GAPDH	12H	22.0463	0.241428		FAM	GAPDH	12H	20.7865	0.0407833
FAM	GAPDH	12H	22.197	0.241428		FAM	GAPDH	12H	20.8632	0.0407833
FAM	GAPDH	24H	23.0398	0.108017		FAM	GAPDH	24H	21.9351	0.0454952
FAM	GAPDH	24H	23.0418	0.108017		FAM	GAPDH	24H	21.9376	0.0454952
FAM	GAPDH	24H	23.2279	0.108017		FAM	GAPDH	24H	22.0151	0.0454952
